# Supplementary material
Source: publisher figshare collection journal article supplement (https://acs.figshare.com/ndownloader/files/3783514)
Supplement: Supplementary file 1 [file 3783514]

# **Synthesis, Characterization and Application in HeLa cells of NIR Light Responsive Doxorubicin Delivery System Based on NaYF<sub>4</sub>:Yb,Tm@SiO<sub>2</sub>-PEG Nanoparticles**

*Paulino Alonso-Cristobal<sup>(1)</sup>, Olalla Oton-Fernandez<sup>(1)</sup>, Diego Mendez-Gonzalez<sup>(1)</sup>, J. Fernando Díaz<sup>(2)</sup>, Enrique Lopez-Cabarcos<sup>(1)</sup>, Isabel Barasoain<sup>(2)</sup> and Jorge Rubio-Retama<sup>(1)\*</sup>*

<sup>(1)</sup> Department of Physical-Chemistry II, Pharmacy Faculty, Complutense University of Madrid, 28040 Madrid, Spain

<sup>(2)</sup> Department of Chemical and Physical Biology, Centro de Investigaciones Biológicas, Consejo Superior de Investigaciones Científicas, Ramiro de Maeztu 9, 28040 Madrid, Spain

Correspondence to: [bjrubio@ucm.es](mailto:bjrubio@ucm.es)

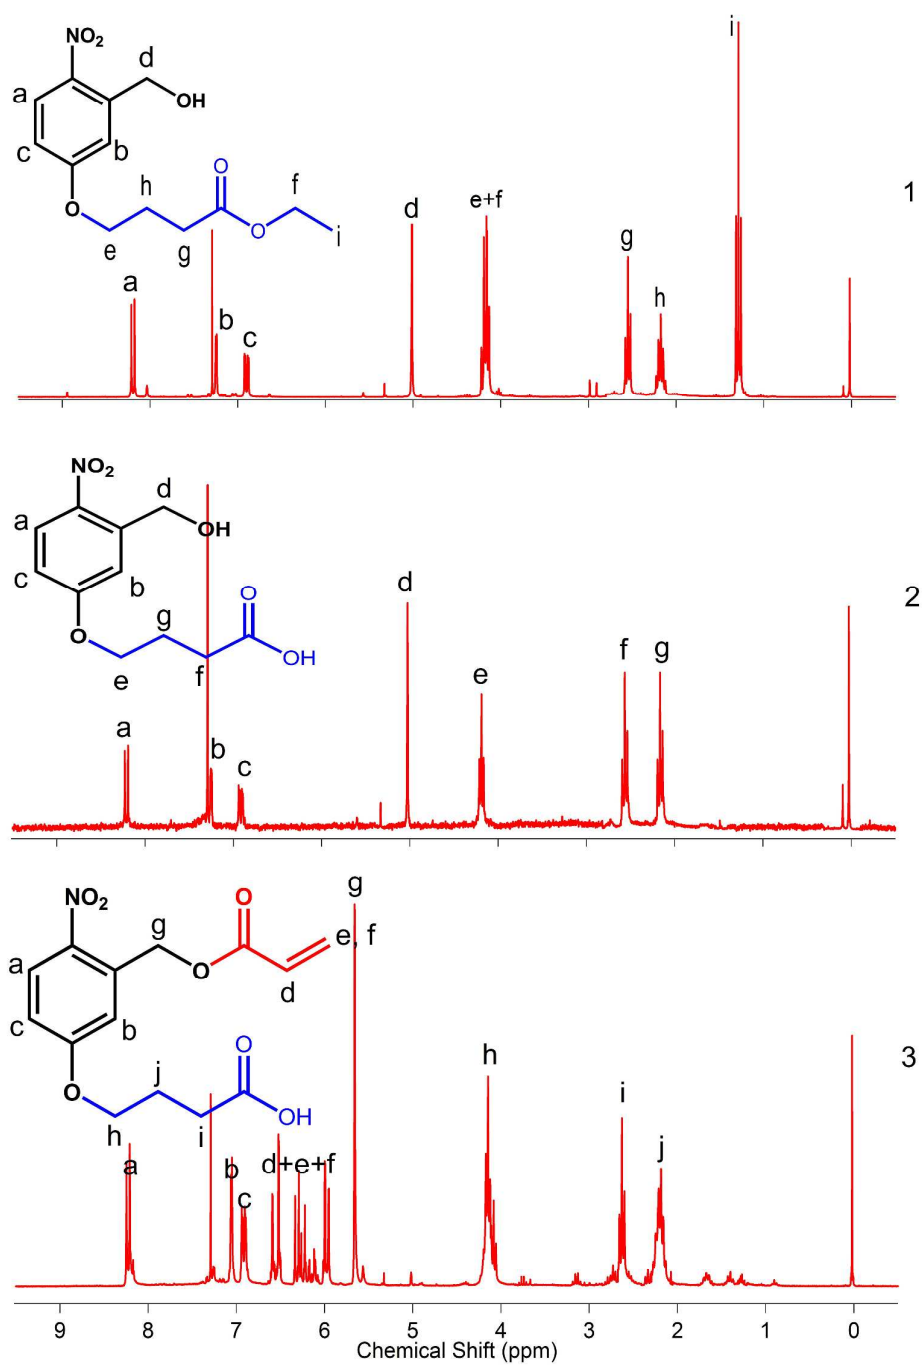

**Figure S1.**  $^1\text{H}$ -NMR in  $\text{CDCl}_3$  of the intermediates synthesized to produce the *o*-NBA derivate.

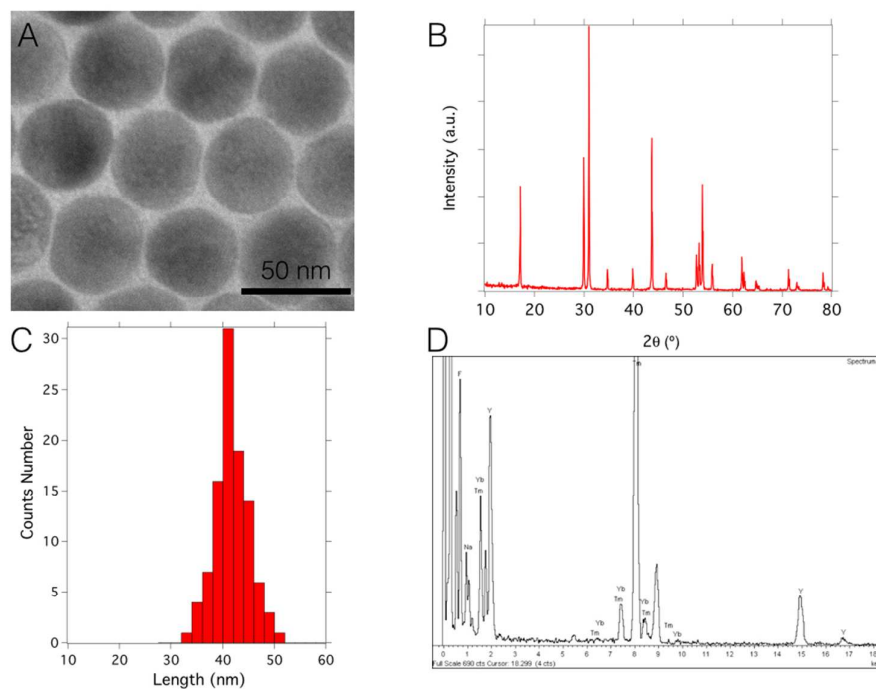

**Figure S2.** A) Magnified TEM micrograph, B) XRD pattern, C) Nanoparticles length distribution and D) EDX spectrum of the synthesized UCNP

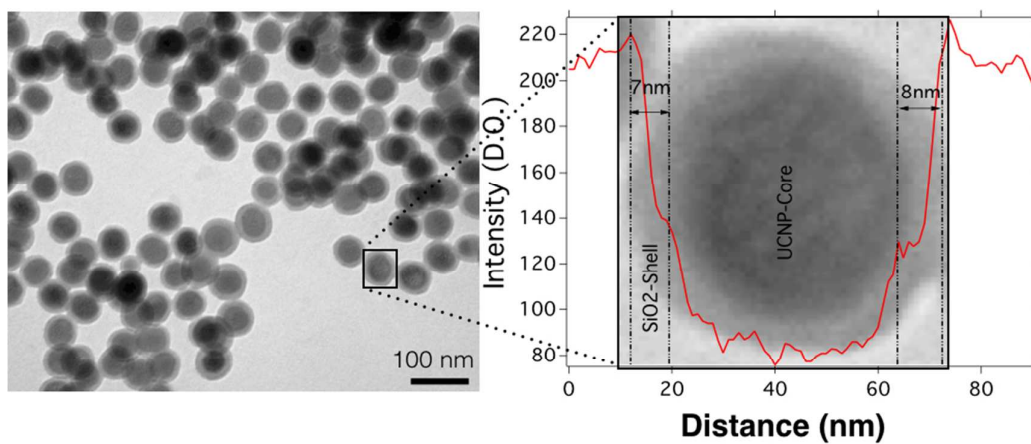

**Figure S3.** A) TEM micrograph of UCNP@SiO<sub>2</sub> nanoparticles and B) magnified UCNP@SiO<sub>2</sub> nanoparticle with the profile plot.

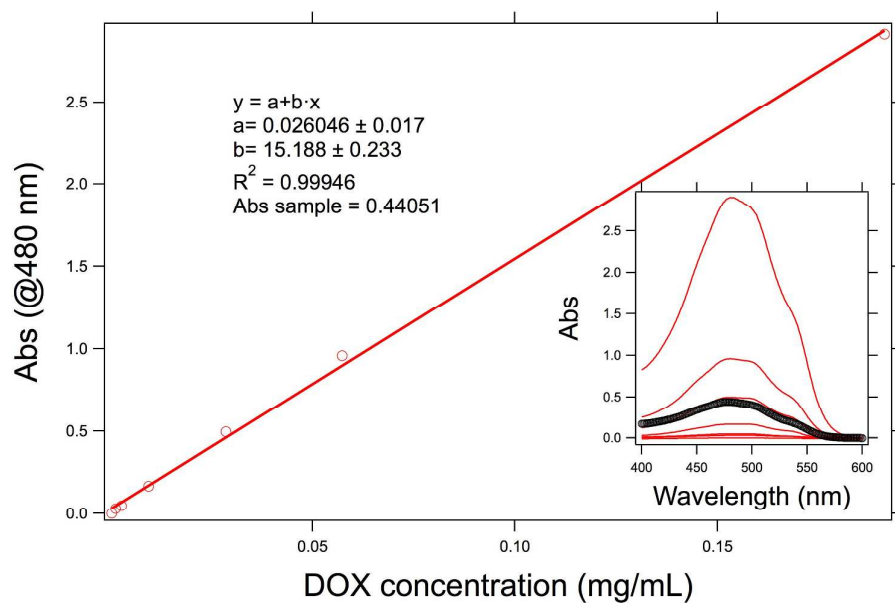

**Figure S4.** UV-Vis calibration curve of the concentration of doxorubicin in water at 480 nm. The inset shows the absorption spectra of different concentrations of doxorubicin (red curves) and the sample (black curve).

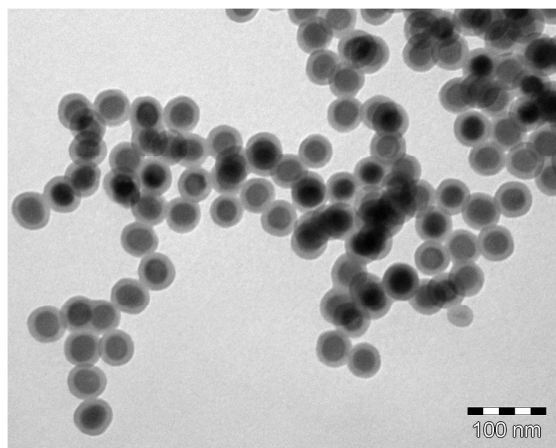

**Figure S5.** TEM micrograph of the Dox-loaded UCNPs@SiO<sub>2</sub> nanoparticles. The surface chemistry process did not affect the size or the shape of the system

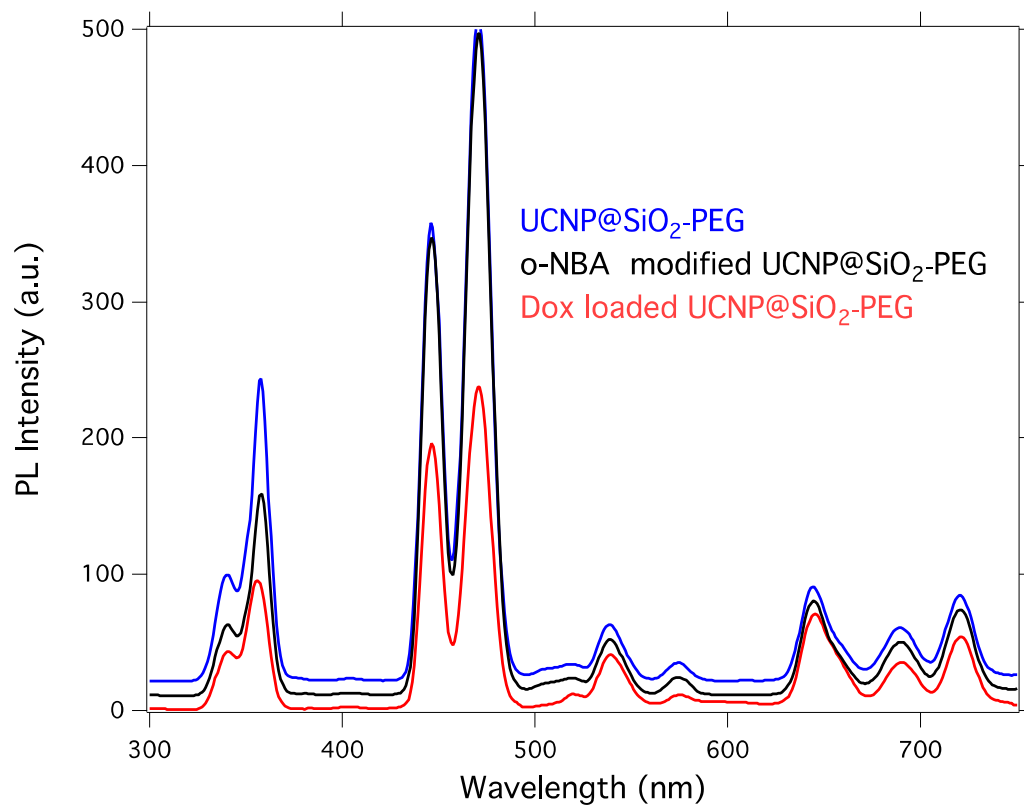

**Figure S6.** PL emission spectra of (blue) UCNP@SiO<sub>2</sub> nanoparticles, (black) o-NBA modified UCNP@SiO<sub>2</sub> nanoparticles and (red) Dox loaded UCNP@SiO<sub>2</sub> nanoparticles. The excitation wavelength was 980 nm. All the spectra were normalized with the peak at 800 nm.
